# Supplementary material
Source: ML conference proceedings conference paper supplement (https://proceedings.mlr.press/v80/kaplanis18a.html)
Supplement: Supplementary file 2 [file kaplanis18a-supp.zip]

Archive with 5 entries (4 files):
- supplementary.pdf
- __MACOSX/
- __MACOSX/._supplementary.pdf
- supp_video.mp4
- __MACOSX/._supp_video.mp4
