# Supplementary material
Source: ML conference proceedings conference paper supplement (https://proceedings.mlr.press/v80/kaplanis18a.html)
Supplement: Supplementary file 2 [file kaplanis18a-supp.zip › supplementary.pdf]

# Supplementary Material for Continual Reinforcement Learning with Complex Synapses

## 1 Experimental details

Tables of parameters for both the tabular and deep Q-learning experiments are shown below.

Table 1: Parameter values for Tabular Q-learning experiments

| PARAMETER                  | VALUE     |
|----------------------------|-----------|
| # EPOCHS                   | 24        |
| # EPISODES/EPOCH           | 10000     |
| MAX # STEPS PER EPISODE    | 20000     |
| $\gamma$                   | 0.9       |
| $\lambda$                  | 0.9       |
| $\epsilon$                 | 0.05      |
| LEARNING RATE              | 0.1       |
| GRID SIZE                  | 10x10     |
| # BENNA-FUSI VARIABLES     | 3         |
| BENNA-FUSI $g_{1,2}$       | $10^{-5}$ |
| ELIG. TRACE SCALE FACTOR * | 10        |

*\*Multiple of eligibility trace that flow between beakers  
is scaled by in modified Benna-Fusi model*

Table 2: Parameter values for Deep RL experiments

| PARAMETER                        | MULTI-TASK             | SINGLE TASK            |
|----------------------------------|------------------------|------------------------|
| # EPOCHS                         | 40                     | 1                      |
| # EPISODES/EPOCH                 | 20000                  | 100000                 |
| MAX # TIME STEPS / EPISODE       | 500                    | 500                    |
| CART-POLE $\gamma$               | 0.95                   | 0.95                   |
| CATCHER $\gamma$                 | 0.99                   | 0.99                   |
| INITIAL $\epsilon$ (EPOCH START) | 1                      | 1                      |
| $\epsilon$ -DECAY / EPISODE      | 0.9995                 | 0.9995                 |
| MINIMUM $\epsilon$               | 0                      | 0                      |
| NEURON TYPE                      | ReLU                   | ReLU                   |
| WIDTH HIDDEN LAYER 1             | 400                    | 100                    |
| WIDTH HIDDEN LAYER 2             | 200                    | 50                     |
| OPTIMISER                        | ADAM                   | ADAM                   |
| LEARNING RATE                    | $10^{-3}$ TO $10^{-6}$ | $10^{-3}$ TO $10^{-6}$ |
| ADAM $\beta_1$                   | 0.9                    | 0.9                    |
| ADAM $\beta_2$                   | 0.999                  | 0.999                  |
| EXPERIENCE REPLAY SIZE           | 2000                   | 1                      |
| REPLAY BATCH SIZE*               | 64                     | 1                      |
| SOFT TARGET UPDATE $\tau$        | 0.01                   | 0.01                   |
| SOFT Q-LEARNING $\alpha$         | 0.01                   | 0.01                   |
| # BENNA-FUSI VARIABLES           | 30                     | 30                     |
| BENNA-FUSI $g_{1,2}$             | 0.001625               | 0.01                   |
| TEST FREQUENCY (EPISODES)        | 10                     | 10                     |

*\*Updates were made sequentially as in stochastic gradient descent, not all in one go as a minibatch.*

## 2 Additional Experiments

### 2.1 Varying Epoch Lengths

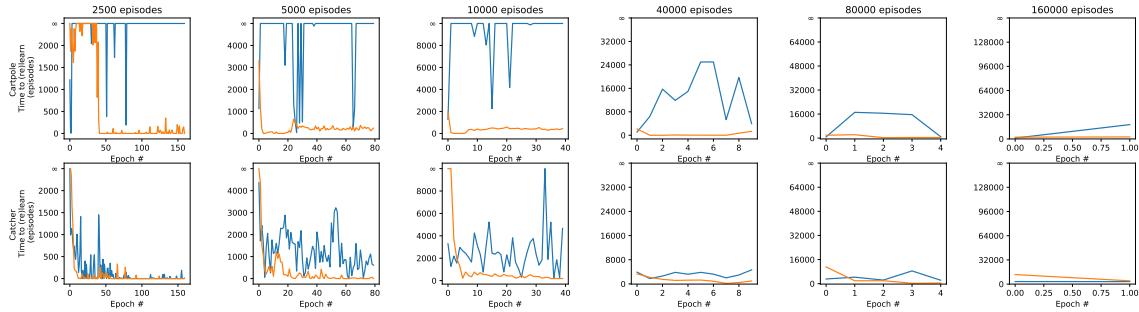

Figure 1: Comparison of time to (re)learn each task in the control agent (blue) and the Benna-Fusi agent (orange) for different epoch lengths. Both agents had a learning rate of 0.001 and the runs with longer epochs were run for fewer epochs. In all cases the Benna-Fusi agent becomes quicker (or in a couple of instances equally quick) at relearning each task than the control agent, demonstrating the Benna-Fusi model’s ability to improve memory at a range of timescales.

### 2.2 Three-task experiments

In order to ensure that the benefits of the Benna-Fusi model were not limited to the two-task setting, we introduced a new task and ran experiments where training was rotated over the three tasks. The new task was a modified version of Cart-Pole where the length of the pole is doubled (dubbed Cart-PoleLong); our criterion for judging that this task was different enough to Cart-Pole to be considered a new task was that when trained sequentially after Cart-Pole in a control agent, it subsequently led to catastrophic forgetting of its policy for the Cart-Pole task.

Figure 2 shows the remembering times for each task for a control agent and a Benna-Fusi agent when training was rotated over the three tasks (Cart-PoleLong  $\rightarrow$  Catcher  $\rightarrow$  Cart-Pole) over a total of 24 epochs. The results indicate that the Benna-Fusi model exhibits the same benefits as in the two-task setting.

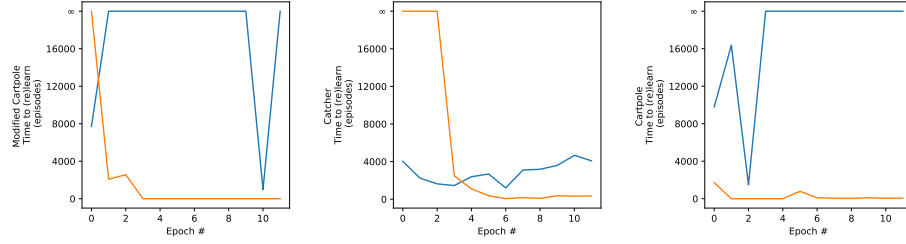

Figure 2: Comparison of time to (re)learn each task in the control agent (blue) and the Benna-Fusi agent (orange) for the three different tasks. Each epoch was run for 20000 episodes and both agents had a learning rate of 0.001. While the Benna-Fusi agent took a little longer to learn Catcher than the control agent, by the end of the simulation the Benna-Fusi agent could learn to recall each task much faster than the control.

### 2.3 Varying size of replay database

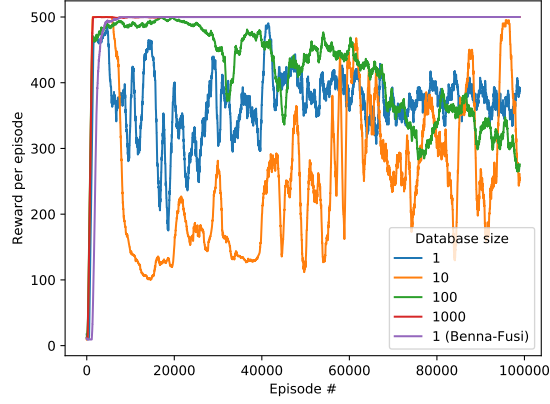

Figure 3: 100 test-episode moving average of reward in Cart-Pole for control agents (all with  $\eta = 0.001$ ) with different sized experience replay databases and the Benna-Fusi agent in just the online setting. For these experiments, 1 experience was sampled for training from the database after every time step. In the control cases, when the database is too small, the agent can not attain a stable performance on the task while the Benna-Fusi agent can.

## 2.4 Catcher single task

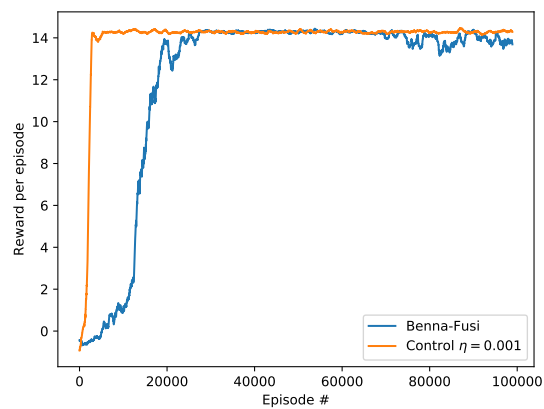

Figure 4: The 100 test-episode moving average of reward per episode in Catcher for the Benna-Fusi agent and the best control agent. The control agent learns faster but both end up learning a good policy.

## 2.5 Varying final exploration value

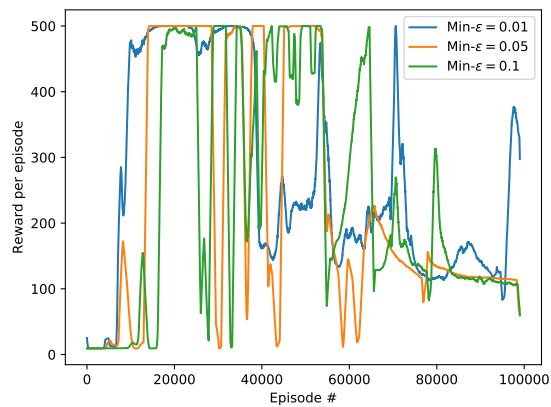

Figure 5: The 100 test-episode moving average of reward per episode in Cart-Pole for control agents where epsilon was not allowed to decay below different minimum values. None of the runs yielded a good stable performance.
